# Supplementary material for: Electrochemical sensor based on bio-inspired molecularly imprinted polymer for sofosbuvir detection
Source: Royal Society of Chemistry journal article supplement (doi:10.1039/d3ra03870j), 2023-01-01
Supplement: d3ra03870j1.pdf [file d3ra03870j1.pdf]

## Supporting Information

for

### “Electrochemical Sensor Based on Bio-inspired Molecularly Imprinted Polymer for Sofosbuvir Detection”

Mahmoud A. Soliman<sup>1</sup>, Amr M. Mahmoud<sup>2\*</sup>, Eman S. Elzanfaly<sup>2,3</sup>, Laila E. Abdel Fattah<sup>1,2</sup>

<sup>1</sup>S for University MisrcieDrug and Sciences Pharmaceutical of Faculty Technology, and nce Egypt ,12566 City, October of <sup>th</sup>6 Chemistry, Analytical of Department Manufacturing,

<sup>2</sup>Egypt ,12613 Cairo, Chemistry, Analytical of Department Pharmacy, of Faculty University, Cairo

<sup>3</sup> Pharmaceutical Analytical Chemistry Department, Faculty of Pharmacy and Drug Technology, Egyptian Chinese University, Cairo, Egypt

\* Corresponding author email: [amr.bekhet@pharma.cu.edu.eg](mailto:amr.bekhet@pharma.cu.edu.eg)

- Surface Characterization of PGE/MIP(PMD) by both SEM and XPS Analysis

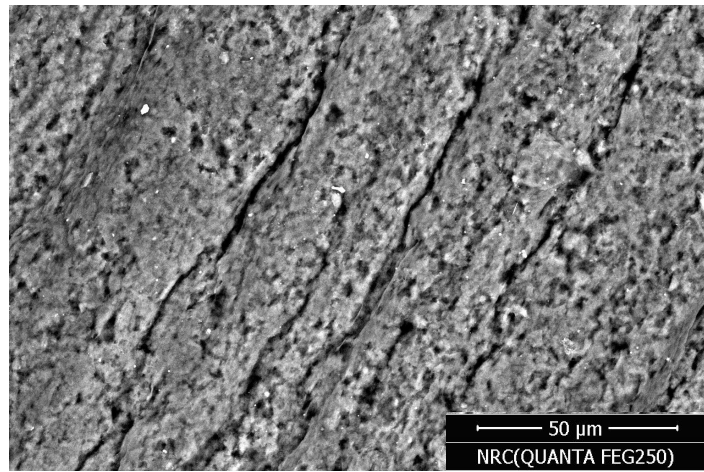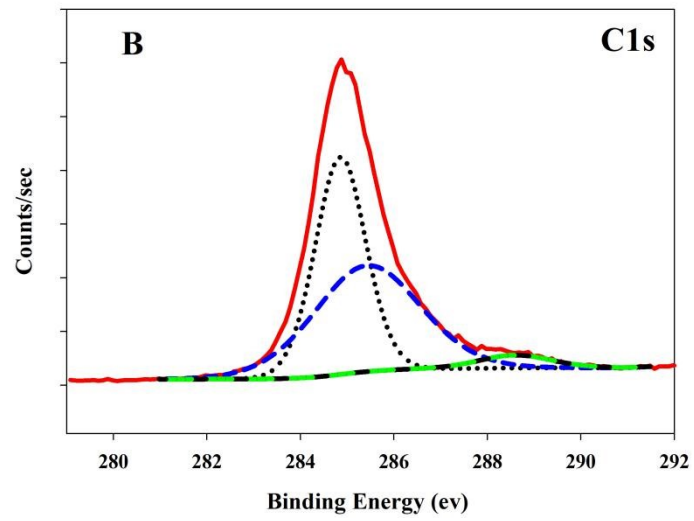

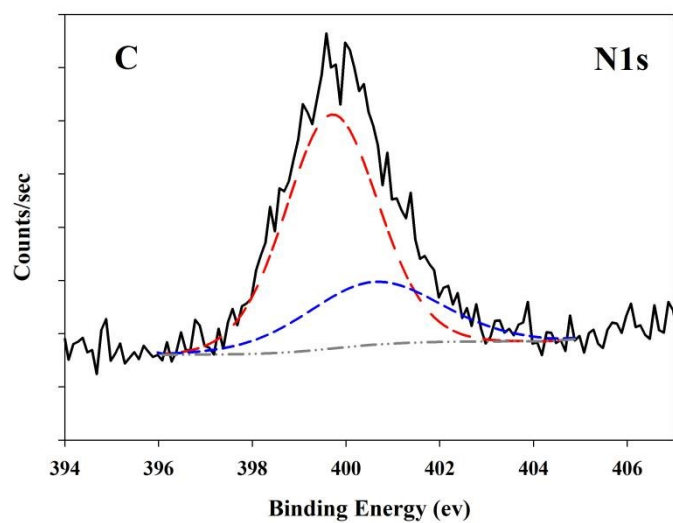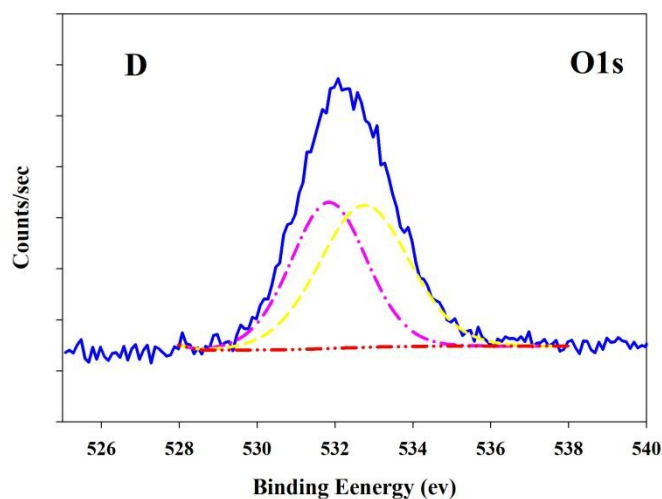

**Figure S1(A).** SEM of the modified PGE/MIP. **Figure S1(B).** High-resolution spectrum in C(1s) region showing three peaks that correspond to C-C , C-N , O-C=O bonds at 284.8 eV, 285.4eV, 288.6 eV, respectively. **Figure S1(C).** High resolution spectrum of N(1s) region, shows two peaks for R-NH-R and aromatic N atoms band at 399.7 eV and 400.5 eV, respectively. **Figure S1(D).** High resolution spectrum of O(1s) region, showing two peaks corresponding to O-C=O, C=O at 531.8 eV and 532.7 eV respectively.
